# Supplementary material for: Neuroimaging of pediatric tumors of the sellar region—A review in light of the 2021 WHO classification of tumors of the central nervous system
Source: PubMed Central journal article supplement (PMC10320298; doi:10.3389/fped.2023.1162654), 2023-06-21
Supplement: Datasheet1.pdf [file Datasheet1.pdf]

## *Supplementary Material*

### **Neuroimaging of Pediatric Tumors of the Sellar Region**

**Rúben Maia<sup>1</sup>, André Miranda<sup>2,3</sup>, Ana Filipa Geraldo<sup>\*2,4</sup>, Luísa Sampaio<sup>1,5</sup>, Antonia Ramaglia<sup>6</sup>, Domenico Tortora<sup>6</sup>, Mariasavina Severino<sup>6</sup>, Andrea Rossi<sup>6,7</sup>.**

<sup>1</sup> Department of Neuroradiology, Centro Hospitalar Universitário São João, Porto, Portugal

<sup>2</sup> Diagnostic Neuroradiology Unit, Imaging Department, Centro Hospitalar Vila Nova de Gaia/Espinho, Vila Nova de Gaia, Portugal

<sup>3</sup> Life and Health Sciences Research Institute (ICVS), School of Medicine, University of Minho, Campus Gualtar, Braga, Portugal

<sup>4</sup> Faculty of Medicine, University of Lisbon, Lisbon, Portugal

<sup>5</sup> Faculty of Medicine, University of Porto, Porto, Portugal

<sup>6</sup> Neuroradiology Unit, IRCCS Istituto Giannina Gaslini, Genoa, Italy

<sup>7</sup> Department of Health Sciences (DISSAL), University of Genoa, Genoa, Italy

**\* Correspondence:**

Corresponding Author

[anafilipageraldo@gmail.com](mailto:anafilipageraldo@gmail.com)

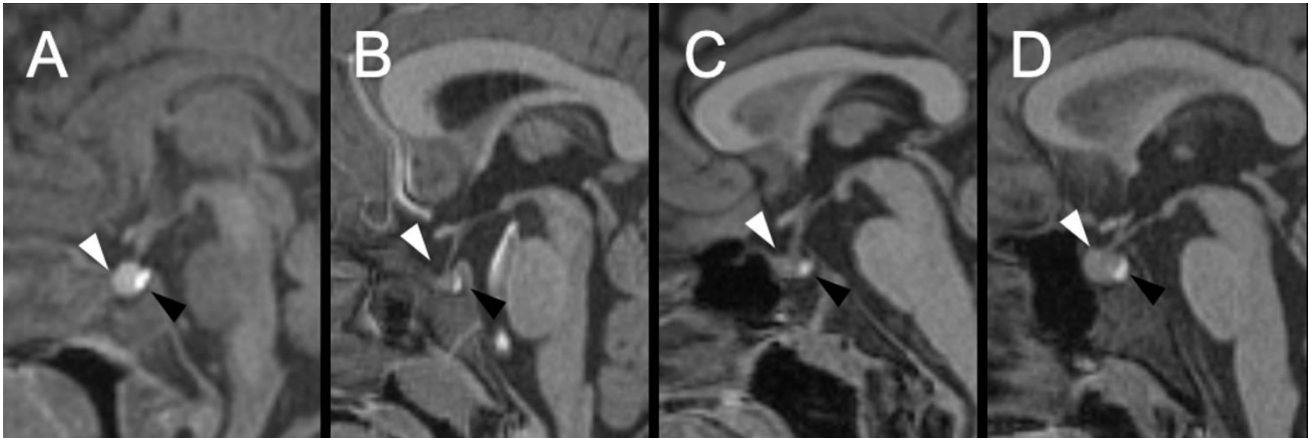

**Supplementary Figure 1.** Physiological changes of the pituitary gland according to age and/or gender. Sagittal T1WI in a 9-day-old female term neonate (A) shows a large pituitary gland, with age-appropriate T1 hyperintensity in both the adeno- and neurohypophysis. Sagittal T1WI in a 4-year-old boy (B) and a 14-year-old boy (C) reveal normal positioning of the pituitary gland in the sella turcica, with isointense adenohypophysis and expected superior concave borders (white arrowhead) as well as adequate preservation of spontaneous T1 hyperintensity of the neurohypophysis (black arrowhead). Sagittal T1WI in a 16-year-old girl (D) demonstrates physiological hyperplasia of the adenohypophysis, with superior convex borders resembling a spherical shape (asterisk).

**Supplementary Table 1. Summary of the main features of pediatric sellar and suprasellar tumors.**

|                                                                   | ACP                                    | PCP                                              | PPT                             | PitNET                                                                                                                                                                                               | PB                                                         | LCH                                                                                                          | JXG                                                                                                          | GCT                                                                                                                                                                                                                                                      | OPG                                                                                                                                              | AT/RT                                                                                                           |
|-------------------------------------------------------------------|----------------------------------------|--------------------------------------------------|---------------------------------|------------------------------------------------------------------------------------------------------------------------------------------------------------------------------------------------------|------------------------------------------------------------|--------------------------------------------------------------------------------------------------------------|--------------------------------------------------------------------------------------------------------------|----------------------------------------------------------------------------------------------------------------------------------------------------------------------------------------------------------------------------------------------------------|--------------------------------------------------------------------------------------------------------------------------------------------------|-----------------------------------------------------------------------------------------------------------------|
| <b>Molecular/<br/>Laboratory<br/>/Genetic</b>                     | CTNNB1<br>(activating)                 | BRAF p.V600E                                     | TTF1                            | 95% sporadic<br>5% familial<br><br>Usually ↑<br>Prolactin or ACTH                                                                                                                                    | DICER1                                                     | BRAF p.V600E<br>(50%)                                                                                        | BRAF p.V600E<br>(only in<br>extracutaneous<br>disease)                                                       | ↑ α-fetoprotein<br>and/or<br>↑ β-HCG                                                                                                                                                                                                                     | BRAF                                                                                                                                             | SMARCB1 (95%)<br>SMARCA4 (5%)                                                                                   |
| <b>WHO grade</b>                                                  | 1                                      | 1                                                | Low grade                       | -                                                                                                                                                                                                    | Controversial                                              | -                                                                                                            | -                                                                                                            | -                                                                                                                                                                                                                                                        | PA: 1<br>PmA: 2                                                                                                                                  | 4                                                                                                               |
| <b>Frequency</b>                                                  | Almost all CP in<br>children           | Rare, especially<br>in children                  | Rare, especially<br>in children | Uncommon in<br>children                                                                                                                                                                              | Rare, but<br>almost all cases<br>presenting in<br>children | CNS<br>involvement:<br>25%                                                                                   | Rare                                                                                                         | 3-4% of all<br>pediatric brain<br>tumors                                                                                                                                                                                                                 | 4% of all<br>pediatric brain<br>tumors                                                                                                           | 20% occur in<br>children <3Y, but<br>rare in the<br>suprasellar region                                          |
| <b>Gender</b>                                                     | M=F                                    | M>F                                              | -                               | Pre-Puberty: M=F<br>Post-Puberty:<br>F>M<br>Prolactinoma:<br>F>>M                                                                                                                                    | F>M                                                        | <1 Y: M=F<br>>1 Y: M>F                                                                                       | M>F                                                                                                          | <i>Overall: M&gt;&gt;F</i><br><i>Suprasellar: M=F</i><br><i>Bifocal: M&gt;F</i>                                                                                                                                                                          | M=F                                                                                                                                              | -                                                                                                               |
| <b>Age<br/>predilection</b>                                       | 5-14 Y                                 | Adults<br>Adolescents (17-<br>18 Y)              | Adults                          | Adults<br>Adolescents                                                                                                                                                                                | < 2 Y                                                      | Median: 3.5 Y                                                                                                | < 6 months                                                                                                   | 10-14 Y<br>Bifocal: older<br>patients                                                                                                                                                                                                                    | <5 Y                                                                                                                                             | <3 A                                                                                                            |
| <b>Main location<br/>within<br/>sellar/suprasellar<br/>region</b> | Suprasellar                            | Sellar +<br>suprasellar, but<br>subdiaphragmatic | Sellar +<br>suprasellar         | Sellar ±<br>suprasellar                                                                                                                                                                              | Sellar and<br>suprasellar                                  | Pituitary stalk<br>Sphenoid                                                                                  | Pituitary stalk                                                                                              | Suprasellar<br>Pituitary Stalk                                                                                                                                                                                                                           | NF-1: ON and<br>chiasm<br><br>Sporadic:<br>posterior optic<br>pathway and<br>hypothalamus                                                        | Suprasellar                                                                                                     |
| <b>Sellar/suprasellar<br/>tumor<br/>morphologic<br/>features</b>  | 90% Cysts<br><br>90%<br>Calcifications | Cysts<br><br>Hiperdense<br>components on<br>CT   |                                 | Lesions not<br>separated from<br>the pituitary gland<br><br>Deviation of the<br>pituitary stalk<br><br>If large:<br>"snowman<br>appearance";<br>cysts and<br>Intratumoral<br>hemorrhage may<br>occur | Nonspecific                                                | Pituitary stalk<br>thickening and<br>enhancement<br><br>Absence of the<br>neurohypophysis<br>T1WI shortening | Pituitary stalk<br>thickening and<br>enhancement<br><br>Absence of the<br>neurohypophysis<br>T1WI shortening | Pituitary stalk<br>thickening and<br>enhancement<br><br>Absence of the<br>neurohypophysis<br>T1WI shortening<br><br>NGGCT tumors:<br>intratumoral<br>hemorrhage<br>more common<br><br>Teratomas: fat<br>tissue and/or<br>calcification /<br>bone / teeth | NF-1 PA:<br>smaller and<br>solid lesions<br><br>Sporadic PA:<br>larger lesions,<br>often with<br>cysts<br><br>PmA:<br>intratumoral<br>hemorrhage | Solid, hemorrhagic<br>and cystic (++)<br>eccentric)<br>components<br><br>Hyperdense on CT<br><br>Calcifications |
| <b>Contrast<br/>enhancement</b>                                   | + Solid<br>component and<br>cyst walls | + Cyst walls                                     | +                               | Delayed<br>enhancement on<br>DCEI                                                                                                                                                                    | +                                                          | +                                                                                                            | +                                                                                                            | +                                                                                                                                                                                                                                                        | -/+<br>peripheral                                                                                                                                | +<br>heterogeneous                                                                                              |

|                              |                     |   |                                                  |                                                                          |                                                                          |                                                                                                              |                                                                                                                  |                                                                                                                                                       |                                            |
|------------------------------|---------------------|---|--------------------------------------------------|--------------------------------------------------------------------------|--------------------------------------------------------------------------|--------------------------------------------------------------------------------------------------------------|------------------------------------------------------------------------------------------------------------------|-------------------------------------------------------------------------------------------------------------------------------------------------------|--------------------------------------------|
| <b>Advanced imaging</b>      | H-MRS: ↑ Lipid peak |   | H-MRS: ↑ Cho peak or absent metabolites          |                                                                          | Restricted diffusion                                                     | Restricted diffusion                                                                                         | Restricted diffusion (ADC lower in germinomas than in NGGCT)                                                     | Facilitated diffusion<br>NF1 PA: ↑ADC and ↓CBF in the subventricular zone                                                                             | Facilitated diffusion<br>H-MRS: ↑Cho; ↓NAA |
| <b>Meningeal involvement</b> | -                   | - | -                                                | -                                                                        | Leptomeningeal lesions may occur (30%)                                   | Leptomeningeal lesions may occur                                                                             | CSF spread                                                                                                       | PmA: CSF spread                                                                                                                                       | CSF spread                                 |
| <b>Other features</b>        | -                   | - | Hypervascular tumor<br>Risk of surgical bleeding | ACTH-producing micro: 3D T1 GE is superior to DCEI                       | Suspect if <2Y with macrocrania and/or family history of multiple tumors | Bone lesions<br><br>Dentate nuclei/basal ganglia/WM degenerative signal abnormalities<br><br>Systemic masses | Cutaneous lesions<br><br>Unifocal or multifocal intracranial xanthogranulomas<br><br>WM degeneration and atrophy | Focal or multifocal intracranial lesions<br><br>NF-1 stigmata (20-50%):<br>e.g:<br>FASI<br>Neurofibroma<br>Lisch nodules<br>Café-au-lait spots<br>... | -                                          |
| <b>Associated syndromes</b>  | -                   | - | -                                                | MEN-1<br>Carney's complex<br>McCune-Albright syndrome<br>Nelson syndrome | DICER1 syndrome                                                          | -                                                                                                            | Erdheim-Chester disease                                                                                          | Klinefelter syndrome<br>Down syndrome                                                                                                                 | NF1 (20-50%)<br>RTPS                       |

**Abbreviations:** ACP - Adamantinomatous craniopharyngioma; ACTH – Adrenocorticotropic hormone; ADC – Apparent diffusion coefficient; ATRT - Atypical teratoid/rhabdoid tumor; β-HCG – Beta-human chorionic gonadotropin; CBF – Cerebral blood flow; Cho – Choline; CNS – Central nervous system; CP – Craniopharyngioma; CSF – Cerebrospinal fluid; CT – Computed tomography; DCEI – Dynamic contrast-enhanced imaging; F – Females; FASI – Focal areas of signal intensity; GCT- Germ cell tumors; GE – Gradient echo; H-MRS – Proton MR spectroscopy; JXG- Juvenile xanthogranuloma; LCH - Langerhans cell histiocytosis; M – Males; MEN – Multiple endocrine neoplasia, type 1; NF-1 – Neurofibromatosis type 1; NGGCT – Non-germinatous germ cell tumor; ON – Optic nerve; OPG – Optic pathway glioma; PA – Pilocytic astrocytoma; PB - Pituitary blastoma ; PCP – Papillary craniopharyngioma; PitNET - Pituitary neuroendocrine tumor; PmA – Pilomyxoid astrocytomas; PPT – Posterior pituitary tumor; RTPS – Rhabdoid tumor predisposition syndrome; WM, White matter; WHO – World Health Organization; Y – Years
